# Supplementary material
Source: Springer Nature journal article supplement (https://www.springermedizin.de/resource/supplementary/12914_2009_76_MOESM3_ESM.pdf/9537462)

## IGF 2005 to 2008 in nominal Ghana Cedi millions

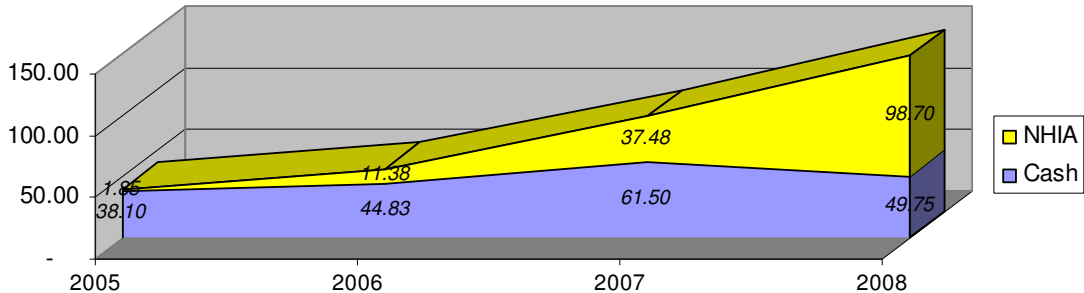

Supplement: MOESM3 [file 9537462]
